# Supplementary material
Source: PubMed Central journal article supplement (PMC4790015)
Supplement: lido003175.ww1_default.pdf [file lido003175.ww1_default.pdf]

**Appendix 1** *Specification of outcomes for exclusions and for end points (bolded)*

| ICD-8                          | ICD-10       | Diagnosis                                                |
|--------------------------------|--------------|----------------------------------------------------------|
| <b>Cardiovascular diseases</b> |              |                                                          |
| 410                            | DI21-22      | Acute myocardial infarction (AMI)                        |
| 411-14                         | DI20, 23-25  | Ischaemic heart disease without AMI                      |
| <b>450</b>                     | <b>DI26</b>  | <b>Pulmonary embolism (PE)</b>                           |
| 430                            | DI60         | Subarachnoid haemorrhage (SAH)                           |
| 431                            | DI61         | Intracerebral haemorrhage (ICH)                          |
|                                | DI62         | Unspecified non traumatic intracranial haemorrhage       |
| 433, 434                       | DI63         | Cerebral infarction                                      |
| 436                            | DI64         | Cerebral apoplexy                                        |
| <b>438</b>                     | <b>DI676</b> | <b>Thrombosis of intracranial vein</b>                   |
|                                | <b>DI801</b> | <b>Thrombophlebitis of femoral vein</b>                  |
| <b>451,08</b>                  | <b>DI802</b> | <b>Deep thrombophlebitis of veins in leg</b>             |
| <b>451</b>                     | <b>DI803</b> | <b>Unspecified deep thrombophlebitis in lower limb</b>   |
| <b>452</b>                     | <b>DI81</b>  | <b>Portal thrombosis</b>                                 |
| <b>453,02</b>                  | <b>DI822</b> | <b>Embolism and thrombosis of caval vein.</b>            |
|                                | <b>DI823</b> | <b>Embolism and thrombosis in renal vein</b>             |
| <b>451,99</b>                  | <b>DI828</b> | <b>Embolism and thrombosis in other specified veins</b>  |
| <b>451,99</b>                  | <b>DI829</b> | <b>Embolism and thrombosis in non-specified veins</b>    |
| <b>Cancer diseases</b>         |              |                                                          |
| 174                            | DC50         | Breast cancer                                            |
| 180                            | DC53         | Cervical cancer                                          |
| 182                            | DC54         | Endometrial cancer                                       |
|                                | DC55         | Cancer of womb without specification                     |
| 183.00-09                      | DC56         | Ovarian cancer                                           |
| 183,19                         | DC570        | Tubal cancer                                             |
| 184                            | DC571-9      | Non specified cancer in female genitals                  |
| 153                            | DC180-189    | Colon cancer                                             |
| 154                            | DC190-211    | Rectum cancer                                            |
| 201                            | DC81         | Malignant lymphoma of Hodgkin type                       |
|                                | DC82         | Malignant lymphoma non Hodgkin, follicular type          |
|                                | DC83         | Malignant lymphoma non Hodgkin, diffuse type             |
| 202                            | DC84         | T-cell malignant lymphoma in skin or systemic            |
| 200                            | DC85         | Malignant lymphoma non Hodgkin, non specified            |
|                                | DC88         | Malignant immunoproliferative disease                    |
| 203                            | DC90         | Myelomatosis                                             |
| 204                            | DC91         | Lymphatic leukaemia                                      |
| 205                            | DC92         | Myeloid leukaemia                                        |
| 206                            | DC93         | Monocyt leukaemia                                        |
|                                | DC94         | Leukaemia other, specified                               |
| 207                            | DC95         | Leukaemia without specification                          |
|                                | DC96         | Non specified cancer in lymphatic or blood tissue (cont) |

## Appendix 1 (cont)

| <b>Pregnancy</b>             |            |                                                    |
|------------------------------|------------|----------------------------------------------------|
|                              | DO000-09   | Ectopic pregnancy                                  |
|                              | DO010-19   | Hydatid mole                                       |
|                              | DO020-29   | Missed abortion                                    |
|                              | DO030-39   | Spontaneous abortion                               |
|                              | DO040-49   | Induced abortion 1st trimester                     |
|                              | DO050-59   | Induced abortion, 2nd trimester                    |
|                              | DO600-849  | Delivery                                           |
| <b>Coagulation disorders</b> |            |                                                    |
|                              | DD680-4    | Bleeding disturbances                              |
|                              | DD685 A    | Leiden factor V, heterozygote                      |
|                              | DD685 B    | Leiden factor V homozygote                         |
|                              | DD685 E    | Prothrombin 20210, heterozygote                    |
|                              | DD685 F    | Prothrombin 20210, homozygote                      |
|                              | DD686 A    | Protein C insufficiency                            |
|                              | DD686 B    | Protein S insufficiency                            |
|                              | DD686 C    | Anti-thrombin III insufficiency                    |
| <b>Surgical procedures</b>   |            |                                                    |
| <b>Old</b>                   | <b>New</b> |                                                    |
| 610xx                        | LCD00-97   | Hysrerectomy (censoring criteria)                  |
| 60100                        | LAE10/11   | Unilateral oophorectomy                            |
| 60300                        | LAF00/01   | Salpingoophorectomy unilateral                     |
| 60120                        | LAE20/21   | Bilateral oophorectomy (censoring criteria)        |
| 60320                        | LAF10/11   | Salpingoophorectomy bilateral (censoring criteria) |
| 608.00-40                    | LGA        | Female sterilisation                               |

*ICD = international classification of diseases*
